# Supplementary material
Source: HighWire-hosted journal article supplement (https://www.cmajopen.ca/highwire/filestream/89652/field_highwire_adjunct_files/1/open-2021-0325-2-at.pdf)
Supplement: open-2021-0325-2-at.pdf [file open-2021-0325-2-at.pdf]

Scoping review of guidance on cessation interventions for electronic cigarettes and dual electronic and combustible cigarettes use.

**Appendix 2. General characteristics and recommendations of included studies.**

| Author and year                                                               | Study Design                         | Target population    | Sample size | Vaping frequency at baseline                 | Objective                                                                                                                           | Methods                                                                                                                                         | Primary Outcome Results                                                                                                                                                                  | Conclusions/recommendations                                                                                   | Limitations/special features                                                                                      |
|-------------------------------------------------------------------------------|--------------------------------------|----------------------|-------------|----------------------------------------------|-------------------------------------------------------------------------------------------------------------------------------------|-------------------------------------------------------------------------------------------------------------------------------------------------|------------------------------------------------------------------------------------------------------------------------------------------------------------------------------------------|---------------------------------------------------------------------------------------------------------------|-------------------------------------------------------------------------------------------------------------------|
| Graham et al, 2020 <sup>48</sup>                                              | Pretest-post test experimental study | Adolescent and youth | 27,000      | NM                                           | To evaluate 'This is Quitting (TIQ)' text-message program delivering motivational and skill training exercises for vaping cessation | -One message per day was sent to all users<br><br>-Self-reported e-cigarette use and abstinence were assessed at 14 and 90 days post-enrollment | -At 14 days, 60.8% respondents indicated they reduced or stopped vaping<br><br>-At 90 days, point prevalence of last vaping within 7 days was 24.7% and more than 30 days ago was 15.5%. | Concluded that youth engagement and acceptance of the program was high among those who wanted to quit vaping. | -Did not conduct bio-chemical verification of abstinence.<br><br>-Further evaluation was conducted through a RCT. |
| Graham et al., 2021 <sup>49</sup>                                             | RCT                                  | Youth                | 2588        | Daily (93.1%), weekly (5.6%), monthly (1.3%) | To determine effectiveness of 'TIQ' text message program delivering cognitive and behavioural skills training for vaping cessation  | All participants in the intervention and the control arms were followed up at 1 month and 7 months post-randomization                           | Self-reported 30-day abstinence rate at 7 months was 24.1% among intervention participants and 18.6% among controls with an odd ratio of 1.39 (95% CI 1.15, 1.68, p<0.001)               | The 'This is Quitting' text message program was an effective vaping cessation intervention among youth.       | Did not conduct bio-chemical verification of abstinence.                                                          |
| Substance Abuse and Mental Health Services Administration, 2020 <sup>50</sup> | Guidance                             | Youth                | NA          | NA                                           | Review evidence and recommend on reduction and cessation of                                                                         | Environmental scans for public health evidence of vaping reduction of                                                                           | - <i>SmokeSCREEN (videogame)</i> : Improved belief and knowledge about vaping (no evaluation of vaping reduction yet)                                                                    | Recommended multifaceted approach at different levels,                                                        | -Most individual and community measures should be tested further                                                  |

Scoping review of guidance on cessation interventions for electronic cigarettes and dual electronic and combustible cigarettes use.

|                                                    |                   |                      |      |    |                                                                                                                             |                                                                                                                                           |                                                                                                                                                                                                                       |                                                                                                                                                                                                                                                                 |                                                                                                                                                                                                                                     |
|----------------------------------------------------|-------------------|----------------------|------|----|-----------------------------------------------------------------------------------------------------------------------------|-------------------------------------------------------------------------------------------------------------------------------------------|-----------------------------------------------------------------------------------------------------------------------------------------------------------------------------------------------------------------------|-----------------------------------------------------------------------------------------------------------------------------------------------------------------------------------------------------------------------------------------------------------------|-------------------------------------------------------------------------------------------------------------------------------------------------------------------------------------------------------------------------------------|
|                                                    |                   |                      |      |    | e-cigarette use among youth                                                                                                 | cessation interventions                                                                                                                   | <p><i>-This is Quitting (text message):</i> Effective in vaping cessation</p> <p><i>-CATCH My Breath (School-based):</i> Effective in reducing vaping</p>                                                             | <p><i>-Individual:</i> ‘smokeSCREEN’, ‘This is Quitting’</p> <p><i>-Community:</i> ‘CATCH My Breath’, media campaigns</p> <p><i>-Population level interventions:</i> Price policies, licensing and zoning policies</p>                                          |                                                                                                                                                                                                                                     |
| Owens et al., 2020 <sup>51</sup>                   | Clinical guidance | Adolescent           | 3304 | NA | To update recommendation on the primary care interventions for tobacco use (including e-cigarette) prevention and cessation | Systematic review and meta-analysis of 12 RCTs evaluating effectiveness of behavioural counselling, NRT and non-NRT for smoking cessation | <p>-Inadequate evidence on benefits of behavioural counselling and medications for tobacco cessation</p> <p>-No reported harms from behavioural counselling</p> <p>-Inadequate evidence on harms from medications</p> | <p>-Insufficient evidence to recommend for or against tobacco cessation interventions- Recommend clinical judgement to make decisions</p>                                                                                                                       | Included studies were on smoking cessation rather than vaping cessation interventions, however, final recommendations included e-cigarettes as a tobacco product                                                                    |
| American Academy of Pediatrics, 2019 <sup>52</sup> | Clinical guidance | Adolescent and youth | NA   | NA | Provide dosage, indications and contraindications for pediatricians to use NRT for patients who want to quit vaping         | -Literature review and clinical decision making based on safety of NRT among adolescents                                                  | NA                                                                                                                                                                                                                    | <p>-Recommended using of off-label NRT (combination of long-acting patch and short acting gum or lozenge) for youth who are moderately to severely nicotine dependent. -NRT were suggested for &lt;18 years old with prescriptions and for &gt;18 years old</p> | <p>-Provided NRT dosing guideline and screening tools for nicotine dependence (HONC tool, e-cigarette dependence scale, mFTQ). Note: mFTQ was not tailored for vaping</p> <p>-Did not provide any evidence of the effectiveness</p> |

Scoping review of guidance on cessation interventions for electronic cigarettes and dual electronic and combustible cigarettes use.

|                                     |                         |                      |    |    |                                                                                                                                  |                                                                                  |    | as OTC medications.                                                                                                                                                                                                                                                                                                                                                                                                                                               | of NRT for vaping cessation or reduction                                                                                                                                 |
|-------------------------------------|-------------------------|----------------------|----|----|----------------------------------------------------------------------------------------------------------------------------------|----------------------------------------------------------------------------------|----|-------------------------------------------------------------------------------------------------------------------------------------------------------------------------------------------------------------------------------------------------------------------------------------------------------------------------------------------------------------------------------------------------------------------------------------------------------------------|--------------------------------------------------------------------------------------------------------------------------------------------------------------------------|
| Hadland & Chadi, 2020 <sup>53</sup> | Clinical guidance       | Youth                | NA | NA | To provide clinical guidance on vaping cessation with a specific focus on screening, assessment, counseling, and pharmacotherapy | Narrative literature review in support of evidence for recommended interventions | NA | <p>Recommended clinicians to follow:</p> <p><i>-Screening tool:</i> S2BI and BSTAD</p> <p><i>-Nicotine dependence assessment tool:</i> HONC, key questionnaire tailored for vaping</p> <p><i>-Counseling:</i> ‘5A’ approach, individual or group counselling, motivational interviewing, CBT and mindfulness approach, phone and text quit lines</p> <p><i>-Medication:</i> NRT (combination of long-acting and short-acting agents); non-NRT (for ≥17 years)</p> | <p>-Provided NRT and non-NRT dosing guidelines</p> <p>- Recommendations for vaping cessation interventions were based on smoking cessation intervention among youth.</p> |
| Chadi et al., 2021 <sup>54</sup>    | Clinical recommendation | Adolescent and youth | NA | NA | To offer vaping cessation strategies for pediatric health care providers                                                         | Narrative literature review in support of evidence for recommended interventions | NA | <p>Recommended pediatricians to follow:</p> <p><i>-Assessment tool:</i> S2BI and CRAFFT modified for vaping; tailored vaping assessment</p>                                                                                                                                                                                                                                                                                                                       | <p>-Provided NRT dosing guidelines</p> <p>- Recommendations are based on the evidence available from smoking cessation</p>                                               |

Scoping review of guidance on cessation interventions for electronic cigarettes and dual electronic and combustible cigarettes use.

|  |  |  |  |  |  |  |  |                                                                                                                                                                                                                                                                                                                                                                                                                                       |                                  |
|--|--|--|--|--|--|--|--|---------------------------------------------------------------------------------------------------------------------------------------------------------------------------------------------------------------------------------------------------------------------------------------------------------------------------------------------------------------------------------------------------------------------------------------|----------------------------------|
|  |  |  |  |  |  |  |  | <p>questions; ‘5A’ approach, HONC</p> <p><i>-Behavioural therapy:</i> individual or group counselling; motivational interviewing; mobile or online resources; reminders; reinforcements</p> <p><i>-NRT (in combination with behavioural therapy):</i> offer for youth experiencing withdrawal symptoms</p> <p><i>-Non-NRT (in combination with NRT and behavioural therapy):</i> Seek guidance from specialist before prescribing</p> | <p>interventions among youth</p> |
|--|--|--|--|--|--|--|--|---------------------------------------------------------------------------------------------------------------------------------------------------------------------------------------------------------------------------------------------------------------------------------------------------------------------------------------------------------------------------------------------------------------------------------------|----------------------------------|

Scoping review of guidance on cessation interventions for electronic cigarettes and dual electronic and combustible cigarettes use.

|                                     |                         |                     |    |       |                                                                                                  |                                                                                                                                                         |                                                                                                                                                                                                                                                                                                                                                                      |                                                                                                                                                            |                                                                                                                             |
|-------------------------------------|-------------------------|---------------------|----|-------|--------------------------------------------------------------------------------------------------|---------------------------------------------------------------------------------------------------------------------------------------------------------|----------------------------------------------------------------------------------------------------------------------------------------------------------------------------------------------------------------------------------------------------------------------------------------------------------------------------------------------------------------------|------------------------------------------------------------------------------------------------------------------------------------------------------------|-----------------------------------------------------------------------------------------------------------------------------|
| Gonzalvo et al., 2016 <sup>55</sup> | Clinical recommendation | Adult with diabetes | NA | NA    | Recommended a standardized dosage of NRT and non-NRT therapies for users who want to quit vaping | Clinical judgement by taking the recommended dosage of NRT and non-NRT for smoking cessation into consideration while recommending for vaping cessation | <p>-Patch: 21 mg for vaping 12-18 mg/ml nicotine at 5 ml/day</p> <p>-Gum or lozenge: 4mg if vaped within 30 mins of waking, 2mg if &gt;30 mins after waking</p> <p>-Bupropion SR: 150 mg po daily × 3 days followed by 150 mg po BID × 12 weeks</p> <p>-Varenicline: 0.5 mg po daily × 3 days followed by 0.5 mg po BID for days 4-7 then 1 mg po BID × 11 weeks</p> | Recommended NRT and non-NRT therapies on reasonable basis                                                                                                  | Did not provide any supportive trial data or case reports on the recommended doses of NRT and non-NRT for vaping cessation. |
| Berg et al, 2021 <sup>56</sup>      | Guidance                | Youth               | NA | NA    | To review evidence on effectiveness of vaping cessation interventions                            | Narrative literature review of evidence in support of behavioural interventions for vaping cessation                                                    | 'This is Quitting', a text messaging program, was found effective for vaping cessation                                                                                                                                                                                                                                                                               | Recommended combinations of technology-based (text-messaging system, smartphone apps) and individualized (one-on-one counseling) behavioural interventions | Evidence provided in support of interventions were mostly on smoking cessation                                              |
| Sikka et al., 2021 <sup>57</sup>    | Case series             | Youth and adult     | 6  | Daily | To evaluate the combination of NRT and counselling                                               | <p>-Regular follow-up up to 12 months</p> <p>-Used tapering doses of</p>                                                                                | 3 out of 6 patients achieved 7-days abstinence by 6 months, and a fourth patient by 8 months                                                                                                                                                                                                                                                                         | Concluded that vaping cessation is possible by utilizing combination of NRTs and                                                                           | -Did not use any vaping dependence scale to measure e-cigarette use                                                         |

Scoping review of guidance on cessation interventions for electronic cigarettes and dual electronic and combustible cigarettes use.

|                                  |             |       |   |       |                                                                                                  |                                                                                                                                                                                                  |                                                                                              |                                                                              |                                                                                                                                                                                                                           |
|----------------------------------|-------------|-------|---|-------|--------------------------------------------------------------------------------------------------|--------------------------------------------------------------------------------------------------------------------------------------------------------------------------------------------------|----------------------------------------------------------------------------------------------|------------------------------------------------------------------------------|---------------------------------------------------------------------------------------------------------------------------------------------------------------------------------------------------------------------------|
|                                  |             |       |   |       | for vaping cessation                                                                             | patch or fixed dose of gum, lozenge or spray with counselling                                                                                                                                    |                                                                                              | motivational interviewing                                                    | -Frequency of e-cigarette use following reported 7-days abstinence was not clear                                                                                                                                          |
| Sahr et al, 2020 <sup>58</sup>   | Case report | Youth | 1 | Daily | To evaluate an alternative approach (vaping taper with behavioural support) for vaping cessation | -Regular clinical follow-ups by a pharmacist up to 6 months<br><br>-Used alternate weekly taper of nicotine concentration and frequency of vaping with behavioural support                       | Modified FTND score turned to 0 from 8 within 8 weeks                                        | Combination of ENDS taper with motivational interviewing was effective       | Participant was initially a smoker, who switched to vaping for smoking cessation and later sought help for vaping cessation                                                                                               |
| Silver et al, 2016 <sup>59</sup> | Case report | Youth | 1 | Daily | To evaluate combination of NRT and behavioural counselling for vaping cessation                  | -Regular clinical follow-ups up to 1 year<br><br>-Used both patch and lozenge first, after one week discontinued patch and continued lozenge, added cinnamon flavoured nicotine gum from 6 weeks | Quit e-cigarette use (measured by FTND score) within 12 weeks, quit NRT within next 6 months | Combination of NRT and behavioural therapy was successful in quitting vaping | Participant was initially a smoker, who switched to vaping for smoking cessation and later sought help for vaping cessation- Nicotine dependence on FTND scale at baseline was measured as per initial smoking frequency. |

Scoping review of guidance on cessation interventions for electronic cigarettes and dual electronic and combustible cigarettes use.

|                                  |                   |       |     |                             |                                                                                        |                                                           |                                                                                                                                                                                                     |                                                                                                                          |                                                                                                                                                                               |
|----------------------------------|-------------------|-------|-----|-----------------------------|----------------------------------------------------------------------------------------|-----------------------------------------------------------|-----------------------------------------------------------------------------------------------------------------------------------------------------------------------------------------------------|--------------------------------------------------------------------------------------------------------------------------|-------------------------------------------------------------------------------------------------------------------------------------------------------------------------------|
|                                  |                   |       |     |                             |                                                                                        | and continued counselling throughout the treatment period |                                                                                                                                                                                                     |                                                                                                                          |                                                                                                                                                                               |
| Health Canada,2021 <sup>60</sup> | Qualitative study | Youth | 137 | Mostly daily, others weekly | To elicit ideas and opinions regarding vaping cessation plan or aids from young vapers | Online focus group discussion                             | Most preferred self-reported approaches were cut back first, then quit vaping; quit with friends' help; text messaging related to vaping cessation; using mobile apps for tracking vaping behaviour | Concluded that all of the proposed vaping cessation approaches and materials were credible, although preferences varied. | -Reported personal preferences rather than effectiveness data on proposed vaping cessation approaches<br><br>-Small sample size, study results cannot be reliably generalized |

Abbreviations: AAP, American Academy of Pediatrics; BSTAD, Brief Screener for Tobacco, Alcohol, and other Drugs; CBT, cognitive behavioural therapy; CPS, Canadian Pediatric Society; CRAFFT, Car-Relax-Alone-Forget-Friends-Trouble; ENDS, electronic nicotine delivery systems; FTND, Fagerstrom Test for Nicotine Dependence; HONC, Hooked on Nicotine Checklist; mFTQ, Modified Version of the Fagerstrom Tolerance Questionnaire; NA, not applicable; NM, not mentioned; NRT, Nicotine replacement therapy; OTC, over the counter; RCT, Randomized controlled trial; S2BI, Screening to Brief Intervention; TIQ, This is Quitting; US, the United States.
